# Supplementary material
Source: ML conference proceedings conference paper supplement (https://openreview.net/forum?id=Il1bbeU2dY)
Supplement: supplementary_material [file attachment]

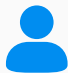

dd人呢?

Hi, where are you?

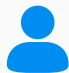

: A

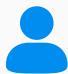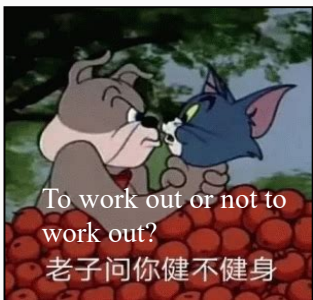

To work out or not to work out?

老子问你健不健身

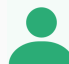

: B

躺着呢，不太舒服不去了

Lying down, not feeling comfortable, so I'm not going

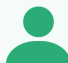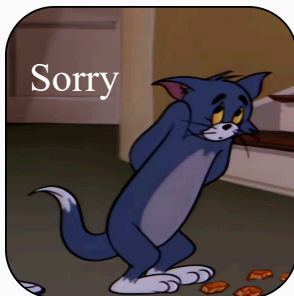

Sorry

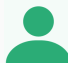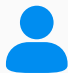

好好好没事

OK, no problem

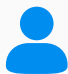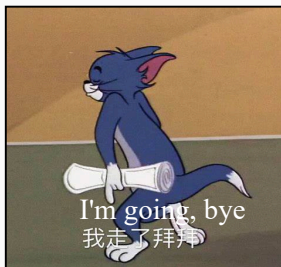

I'm going, bye  
我走了拜拜

好的呢，去吧去吧

OK, just go ahead

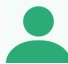

**摘要:** A问B健不健身, B身体不舒服去不了并表达歉意, A表示没事并自己去了, B赞同。

**Summary:** A asks B if they work out, B explains he can't because he's feeling unwell and apologizes. A says it's okay and go alone. B agrees.
