# Supplementary material
Source: ML conference proceedings conference paper supplement (https://openreview.net/forum?id=Il1bbeU2dY)
Supplement: supplementary_material [file attachment]

dd人呢?

Hi, where are you?

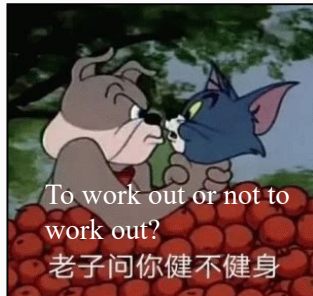

躺着呢，不太舒服不去了

Lying down, not feeling comfortable, so I'm not going

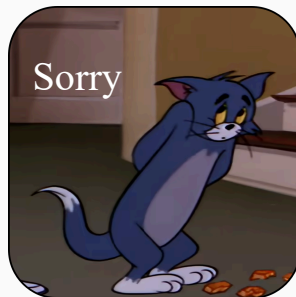

好好好没事

OK, no problem

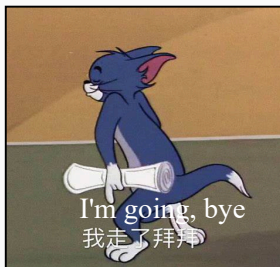

好的呢，去吧去吧

OK, just go ahead

用一句摘要概括这段带有表情包的对话，注意同时考虑表情包和文本。

Summarize this sticker-enriched dialogue in one sentence, considering both the stickers and the text.

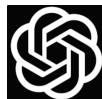

COTs for GPT4

用一句摘要概括这段带有表情包的对话，注意同时考虑表情包和文本，但不用刻意提到表情包直接包含在内容里就行。

Summarize this sticker-enriched dialogue in one sentence, considering both the stickers and the text, but without explicitly mentioning the stickers as they are embedded within the content.

**摘要：** A问B人呢，并用一张表情包喊他健身，B不去，因为身体不舒服并发了一张道歉的表情包，A说没事，发表情包说表达离开，B让他去吧。

**Summary:** A asks B where he is, and then sends a sticker urging him to exercise. B declines, citing discomfort and sends an apologetic sticker. A reassures him, sending a sticker indicating departure, and B tells A it's okay to go.

ours COT

**摘要：** A问B健不健身，B身体不舒服去不了并表达歉意，A表示没事并自己去了，B赞同。

**Summary:** A asks B if they work out, B explains he can't because he's feeling unwell and apologizes. A says it's okay and go alone. B agrees.
