# Supplementary material
Source: ML conference proceedings conference paper supplement (https://openreview.net/forum?id=Il1bbeU2dY)
Supplement: supplementary_material [file attachment]

sentence: 俺中彩票了! (Won the lottery!)

1

GPT4(Short, Social Media, Colloquial...)

2

Sticker

A: 哈哈哈哈哈(hahahaha)

B: 怎么了(What's up)

A: 俺中彩票了! (Won the lottery!)

A: Sticker1

B: 怎么了(What's up)

A: 俺中彩票了! (Won the lottery!)

B: Sticker2

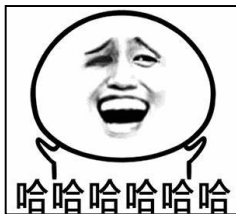

(hahahahaha)

Sticker1

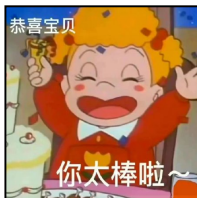

(Congratulations!

You're awesome!)

Sticker2

3

Summary: A笑得很开心, B问怎么了, A说中了彩票。(A laughs happily. B asks what's up, and A says he won the lottery.)

Summary: A笑得很开心, B问怎么了, A说中了彩票, B祝贺并夸赞A。(A laughs happily. B asks what's up, and A says he won the lottery. B congratulates and praises A.)
