# Supplementary material
Source: ML conference proceedings conference paper supplement (https://openreview.net/forum?id=Il1bbeU2dY)
Supplement: supplementary_material [file attachment]

**Initial sentence:** 医生说很常见，在青少年中尤其如此。(The doctor said it's quite common, especially among teenagers.)

**Syntactic tree depth:** 4  
**Characteristics:** Colloquial, Natural  
**Dialogue length:** Medium  
**Scenario:** Social Media

**Chain-Of-Thought:** 生成一段长度中等的社交媒体上的闲聊对话，包含句子：“医生说很常见，在青少年中尤其如此。”要求对话自然且口语化，并且检查对话有没有逻辑错误。(Generate a chat dialogue of medium length on social media including the sentence, "The doctor said it's quite common, especially among teenagers." The dialogue needs to be natural and colloquial. Then check if there's any logical error in the dialogue.)

**Dialogue**

A: 我听说安迪最近总是感到疼痛。  
(A: I heard that Andy has been experiencing pain recently.)  
B: 是的，他去看医生。  
(B: Yes, he went to see a doctor.)  
A: 医生说了什么？  
(A: What did the doctor say?)  
B: 他说安迪是发育期的疼痛。  
(B: He said that Andy is experiencing developmental pain.)  
A: 这种情况常见吗？  
(A: Is this situation common?)  
B: 医生说很常见，在青少年中尤其如此。  
(B: The doctor said it's quite common, especially among teenagers.)  
A: 那么，有什么特别的处理方法吗？  
(A: So, are there any specific treatment options?)  
B: 医生建议进行适当的运动和保持良好的饮食。  
(B: The doctor recommended engaging in appropriate exercise and maintaining a healthy diet.)

*There's no logical error in this dialogue.*
