# Supplementary material
Source: ML conference proceedings conference paper supplement (https://openreview.net/forum?id=Il1bbeU2dY)
Supplement: supplementary_material [file attachment]

|                                                                                                                                                                |                                                                                                                  |                                                                                                                     |
|----------------------------------------------------------------------------------------------------------------------------------------------------------------|------------------------------------------------------------------------------------------------------------------|---------------------------------------------------------------------------------------------------------------------|
| <p><b>A:</b> 那家餐厅你去过了吗?<br/>Have you tried that restaurant?</p> <p><b>B:</b> 那家餐厅是挺好吃的呢<br/>It is quite delicious</p> <p><b>A:</b> Sticker-1</p>               |  <p>啊?<br/>是真的吗?<br/>真的是这样子吗?</p> | <p>(Ah? Is it true? Is it really like this?)</p> <p><b>TEI:</b> 惊讶, 怀疑, 提出疑问(Surprised, Doubt, Raise questions)</p> |
| <p><b>B:</b> Sticker-2</p> <p><b>B:</b> 因为菜品质量很高<br/>For the quality of dishes is great.</p> <p><b>A:</b> 那下次我们一起去吃<br/>Sure, let's go together next time.</p> |                                                                                                                  | <p>(Yes, yes)</p> <p><b>TEI:</b> 赞同, 认可 (Agreement, Approval)</p>                                                   |
| <p><b>B:</b> 行<br/>OK</p> <p><b>B:</b> Sticker-3</p>                                                                                                           |  <p>期待!</p>                     | <p>(Look forward to it!)</p> <p><b>TEI:</b> 开心, 期待 (Happu, Anticipate)</p>                                          |

**Bart:** 两人讨论了上次那家餐厅质量不错, 并计划下次一起去吃饭。

The two discussed the good quality of the restaurant they went to last time and planned to go there together for the next meal.

**Bart-TEI:** A问B一家餐厅, 并**怀疑**B对它的称赞, B**认可**那里菜品质量很高。A说下次一起去, B同意并表示**十分期待**。

A asked B about a restaurant, expressing **skepticism** about B's praise for it. B **acknowledged** that the food quality there was high. A suggested going there together next time. B agrees and expresses **great anticipation**.

**VG-Bart:** A问B有没有去过一家餐厅。B**赞美**餐厅好吃, A对此有点**惊讶**, B表示因为菜品质量高。A想一起去B**开心地**同意了。

A asked B if he had been to the restaurant. B praised the restaurant for being delicious. A was a bit **surprised** by this, and B said it was because of the high quality of the dishes. A wanted to go together and B **happily** agreed.

**ChatGPT:** A问B是否去过那家餐厅。B说那家餐厅很不错, 因为菜品质量高。A提议下次一起去吃。B表示同意。

A asked B if he had been to that restaurant. B replied that the restaurant is very good because of the high quality of the dishes. A suggested going there together next time. B agreed.

**Ground-Truth:** A向B打听家餐厅, B说那家挺好吃, A有点**怀疑**为何, B**称赞**那里菜品质量高。A约B下次一起去, B表示很**期待**。

A asked B about a restaurant. B said it's quite delicious. A was a bit **doubtful why**. B **praised** that the food quality there was very high. A invited B to go together next time, and B expressed **eagerness**.
