# Supplementary material
Source: ML conference proceedings conference paper supplement (https://openreview.net/forum?id=Il1bbeU2dY)
Supplement: supplementary_material [file attachment]

(Neutral, Inform the information)

我考试考了80分  
(I scored 80 points  
in the exam)

伤心难过, 哭泣  
(Sad, Cry)

开心喜悦, 庆祝  
(Happy,  
Celebrate)

+

S1

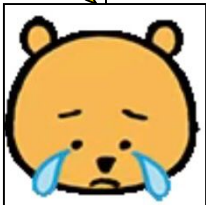

S2

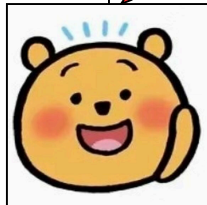

**Text EI:** Neutral, Inform

**Multimodal-S1 EI:** Sad, Complain

**Multimodal-S2 EI:** Happy, Celebrate
