# Supplementary material
Source: ML conference proceedings conference paper supplement (https://openreview.net/forum?id=Il1bbeU2dY)

## Multimodal Dialogue Construction (adding stickers)

## Automatic and manual check

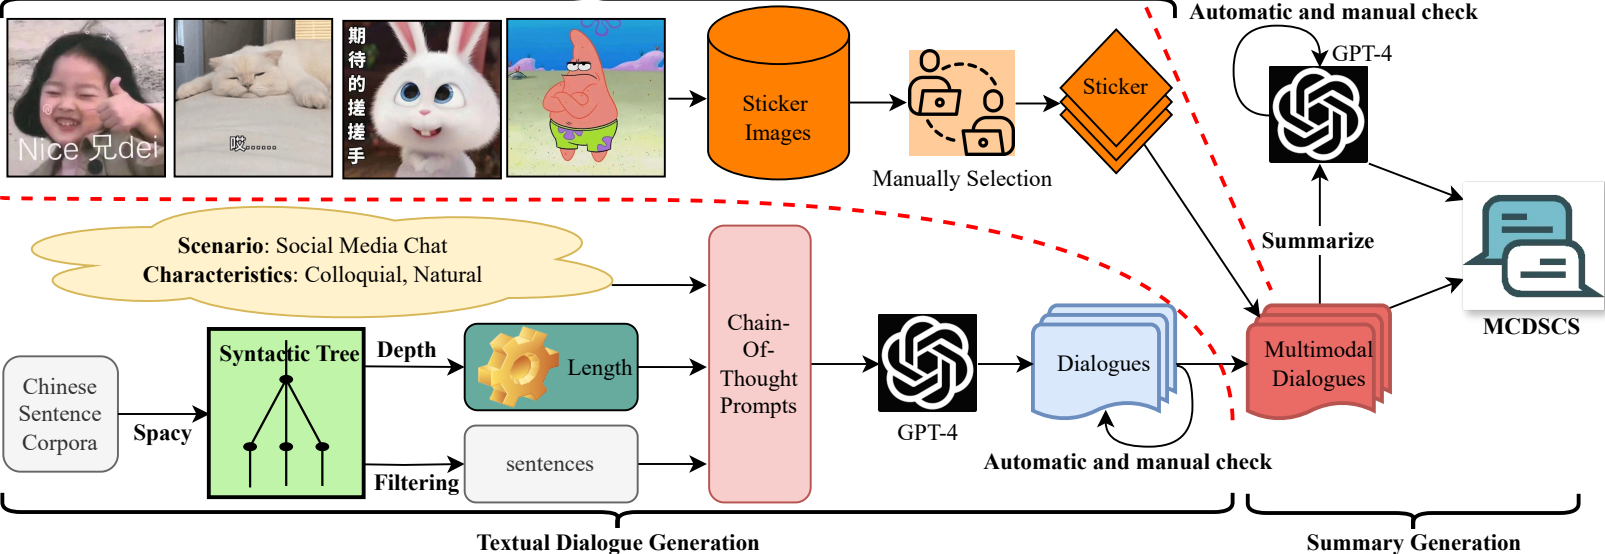

Supplement: supplementary_material [file attachment]
